# Supplementary material for: Potential Reach of mHealth Versus Traditional Mass Media for Prevention of Chronic Diseases: Evidence From a Nationally Representative Survey in a Middle-Income Country in Africa
Source: PubMed Central journal article supplement (PMC4893150; doi:10.2196/jmir.5592), 2016-05-20
Supplement: jmir_v18i5e114_app1.pdf [file jmir_v18i5e114_app1.pdf]

## Appendix 1: Study survey questions and responses categories

|                                     | Measuring details                                                                                                                                                              | Classification criteria                                                                                                                                                                                |
|-------------------------------------|--------------------------------------------------------------------------------------------------------------------------------------------------------------------------------|--------------------------------------------------------------------------------------------------------------------------------------------------------------------------------------------------------|
| <b>Socio-demographic variables</b>  |                                                                                                                                                                                |                                                                                                                                                                                                        |
| Age groups                          | Equally distributed age groups                                                                                                                                                 | 25-34, 35-44, 45-54, 55-64                                                                                                                                                                             |
| Education                           | (Self-reported) What is the highest level of education you have completed?                                                                                                     | Did not complete obligatory school<br>Completed obligatory school<br>Attended a vocational school<br>Attended a high-school or technical school<br>Attended a university                               |
| Income                              | (Self-reported) What is your personal earnings (SRP) per month, on average (incl. all allowances, benefits, etc)? (1000 SRP = \$78 USD)                                        | 1: <3000<br>2: 3000-5000<br>3: 5000-8000<br>4: 8000-15'000<br>5: >15'000                                                                                                                               |
| Occupation                          | (Self-reported) current occupation, categorized by interviewer, or last held job if unemployed.                                                                                | Non-qualified (labourer)<br>Semi-qualified manual (some training);<br>Qualified manual (trained mechanic, farmer)<br>Semi-qualified non-manual (clerk)<br>Professional/ qualified non-manual (teacher) |
| <b>NCD variables</b>                |                                                                                                                                                                                |                                                                                                                                                                                                        |
| BMI                                 | (Measured) Calculated based on measured weight (kg) divided by height (m) squared and classified according to WHO recommendations [46].                                        | Normal weight (18.5-24.9)<br>Overweight (25.0-29.9)<br>Obese (> 30.0)                                                                                                                                  |
| Physical activity                   | (Self-reported) Which of the following best suits your physical activity pattern in relation to doing work in your workplace or at home?                                       | Sedentary: sitting always or most often<br>Moderate: often walking, standing up or carrying light weights<br>Heavy: walking or standing up a lot, or regularly carrying heavy weights                  |
| Alcohol consumption                 | (Self-reported) Averages number of specific drink type consumed per week x its volume in ml x its alcohol in % )/7= grams of alcohol per day<br>(10 grams of alcohol = 1 unit) | Non-drinker: 0 unit /week<br>Moderate drinker (men): 1-21 units/week<br>Moderate drinker (women): 1-14 units/week<br>Heavy drinker(men): > 22 units/week<br>Heavy drinker (women): > 15 units/week     |
| Smoking status                      | (Self-reported) Smoking category                                                                                                                                               | Current/occasional smoker<br>Ex-smoker<br>Never smoked                                                                                                                                                 |
| Hypertension                        | (Measured) Average of three blood pressure measurement by a trained nurse and grouped as per cut-off recommendation [47].                                                      | Positive: > 140 SBP or >90 DBP<br>Negative: <140 SBP and <90 DBP                                                                                                                                       |
| Elevated blood Glucose              | (Measured)Fasting glucose analysed on capillary blood<br>Recommended cut off [47]                                                                                              | Negative: fasting plasma glucose < 6.1 mg/dl<br>Positive: fasting plasma glucose > 6.1 mg/dl                                                                                                           |
| <b>Mobile technology assessment</b> |                                                                                                                                                                                |                                                                                                                                                                                                        |
| Mobile ownership                    | Do you have a mobile phone?                                                                                                                                                    | Yes or no                                                                                                                                                                                              |
| Internet on mobile                  | Can your mobile phone access internet (e.g. smart phone: Iphone, Android, Blackberry, Windows, ... )?                                                                          | Yes or no                                                                                                                                                                                              |
| Internet use on mobile              | Do you use internet with your phone?                                                                                                                                           | Yes or no                                                                                                                                                                                              |
| Personal computer                   | Do you have a tablet or computer (your own or that you can use whenever you want outside of work)?                                                                             | Yes or no                                                                                                                                                                                              |
| Internet on PC/tablet               | Do you use internet with a computer or tablet (outside of work)?                                                                                                               | Yes or no                                                                                                                                                                                              |
| Email                               | Do you have an email address?                                                                                                                                                  | Yes or no                                                                                                                                                                                              |
| SMS for health                      | Would you like to receive SMS (text) on your                                                                                                                                   | Yes or no                                                                                                                                                                                              |

|                      |                                                                                                                                                                               |           |
|----------------------|-------------------------------------------------------------------------------------------------------------------------------------------------------------------------------|-----------|
|                      | phone related to health?                                                                                                                                                      |           |
| Email for health     | Would you like to receive emails related to health?                                                                                                                           | Yes or no |
| <b>Mass media</b>    |                                                                                                                                                                               |           |
| TV program on NCD    | In the past 12 months, can you remember to have watched a program on cardiovascular disease, smoking, blood pressure, diabetes or diet on SBC TV?                             | Yes or no |
| Radio program on NCD | In the past 12 months, can you remember to have listened to a program on health, particularly cardiovascular disease, smoking, blood pressure, diabetes or diet on SBC radio? | Yes or no |
